# Supplementary material for: Genetic Screening of Tuberous Sclerosis Complex in Sicily with a Focus on Neurological Manifestations
Source: Research Square preprint supplement (doi:10.21203/rs.3.rs-5804009/v1), 2025-04-14
Supplement: Supplementary file 1 [file 777906f2fa3fe5b3b7daceca.xlsx]

## Sheet: Foglio1
Patient	Age	Sex	Genetics					Epilepsy						Associated Neuropsychiatric disorders					Brain MRI findings
			Gene	Variant	Exon	Inherited/de Novo	Presence in Databases (GnomAD; ClinVar) or Submitted by the Authors in ClinVar (SUB#)	Present	Onset (months)	Type of seizures	Crises per week	EEG findings	Treatment > seizure outcome	Intellectual Disability	Autism	Specific Learning disorders	Behavioural disorders	Others	Tubers	SEN	SEGA	Radial Bands	Cerebral Cysts	White matter anomalies	Other anomalies
1	8	M	TSC1	c.1355_1358delGTTC; p.(Gly452Valfs*4)	14	De novo	SUB15233733	No	-	-	-	Normal	-	-	-	-	-	-	Few	None	-	1	-	Many
2	11	M	TSC1	c.-219_-144+3del; p.(?)	Intron 1	De novo	SUB15233796	Yes	8	Infantile spasms, leftwards deviation of eyes	28	Hypsarrhytmia	VPA; ACTH > Remission	-	-	-	-	-	None	None	-	-	-	Limited
3	21	F	TSC1	c. 2111_2112delAT; p.(Tyr704Ter)	17	Inherited	SUB15233928	No	-	-	-	Normal	-	-	-	-	-	-	Many (Frontal, Parietal)	Many	-	-	-	-
4	6	F	TSC1	c.2672dupA; p.(Asn891Lysfs*13)	21	De novo	SUB15233938	Yes	24	Focal	3	Normal	VGB; LEV; VPA > Drug-Resistant	Mild	-	Dyslexia	ADHD	-	Many (Frontal, Temporal, Parietal)	Many, one next to left FM with intense enhancement	-	1	-	-
5	37	M	TSC1	c.2293C>T; p.(Gln765Ter)	18	De novo	ClinVar	No	-	-	-	Normal	-	Mild	-	Dyslexia	-	-	Many	None	-	-	6	-
6	23	M	TSC1	c.938C>T; p.(Ser313Phe)	10	De novo	GnomAD	Yes	37	Focal, eyes and head deviation, hypertonic right limbs, no loss of contact	1	Right frontal-central-temporal SW + indipendent left spikes	OXC, VPA > Drug-Resistant	Severe	Level 2	Dsylexia, Dysgraphia	Aggression; Agitation	-	Many (frontal, temporal) 5-20mm	Few (small)	-	-	-	-
7	52	M	TSC1	c.1888_1891delAAAG; p.(Lys629 fs>+21aa)	15	Inherited	SUB15233951	Yes	24	Left focal	6	Left frontal-temporal SW	CBZ > Remission	-	-	-	-	-	Many (frontal,parietal, temporal,occipital)	Many	-	4	-	-
8	21	M	TSC1	c.1888_1891delAAAG; p.(Lys629 fs>+21aa)	15	Inherited (son of 7)	SUB15233951	Yes	12	Infantile spasms,hypertonic,atonic,eyes rolling , gelastic, absence, tonic clonic	21	Bilateral central, frontal theta waves and SW	VPA, VGB, LTG, EVR > Drug-Resistant	Severe	Level 1	Dyslexia and Dyscalculia	Anxiety	-	Many (frontal,parietal,1 occipital calcified)	Many (calcified , some next to FM with mild enhancement )	-	12	-	Limited
9	21	M	TSC1	c.192_195del; p.(Leu64Phefs*34)	4	Inherited	SUB15233966	Yes	24	Seizures with fever	0.0001	Normal	No treatment > Remission	-	-	-	-	-	None	Many (1 mm)	1 Right ventricle (surgery)	-	-	-
10	45	F	TSC1	c.2215C>T; p.(Gln739*)	18	Inherited	ClinVar	Yes	24	Loss of contact, tongue movements, generalized tonic clonic	-	Left temporal SW	VGB > Remission	Moderate	-	Dyslexia	-	-	None	Many (calcified)	-	-	-	Limited
11	41	M	TSC1	c.1004delC; p.(Tyr335Asnfs*3)	10	De novo	SUB15233980	Yes	96	Focal	2	Normal	VPA > Remission	-	-	-	-	-	Many	Many (calcified)	-	-	-	-
12	10	M	TSC1	c.1004delC; p.(Tyr335Asnfs*3)	10	Inherited (son of 11)	SUB15233980	Yes	48	Absence, generalized tonic clonic, vomit, focal crisis secondarily generalized	5	Bilateral diffuse SW	VPA > Remission	-	-	-	-	-	Many (frontal, parietal, temporal, occipital)	Many (2-7mm) some next to FM	-	-	-	-
13	60	F	TSC1	c.1498C>T; p.(Arg500Ter)	15	De novo (mother of 14, 15)	ClinVar	No	-	-	-	Left temporal occasional sharps theta waves and spikes	-	-	-	-	-	-	None	Few	-	-	-	-
14	33	F	TSC1	c.1498C>T; p.(Arg500Ter)	15	Inherited (daughter of 13)	ClinVar	Yes	60	Loss of contact, arm spasms ,shout,fear	14	Right temporal spikes, indipendent left temporal spikes	VPA; BRZ; CBZ; PB > Partial control	-	-	-	Anxiety; Depression; Aggression; Suicide Attempts	Panic Attacks	Many	Few (4 mm)	-	11	-	Many
15	26	F	TSC1	c.1498C>T; p.(Arg500Ter)	15	Inherited (daughter of 13)	ClinVar	Yes	12	Head drops, limb spasms, eyes rolling,mouth foaming, generalized tonic clonic seizures, loss of contact, absences	21	Bilateral/indipendent central occasional sharps theta waves, left temporal spikes	VPA; CBZ; LTG; CBD > Drug-Resistant	Borderline	-	Dyscalculia	Anxiety; Depression	Insomnia	Many (frontal, temporal), calcified	Many (6mm) some with enhancement,one next to FM	-	1	-	Many
16	2	M	TSC1	c.1498C>T; p.(Arg500Ter)	15	Inherited (son of 14)	ClinVar	No	-	-		Normal	-	Mild motor delay	-	-	-	-	Many	None	-	14	-	Many
17	7	F	TSC1	c.1498C>T; p.(Arg500Ter)	15	Inherited (daughter of 15)	ClinVar	Yes	36	Focal tonic seizures	5	Left frontal/central paroxysmal high voltage spikes and SW	CBZ > Partial control	Borderline	-	Dyslexia, Dyscalculia	Aggression; Agitation	Insomnia	Many	Few	-	13	-	-
18	3	F	TSC1	c.1498C>T; p.(Arg500Ter)	15	Inherited (daughter of 15)	ClinVar	No	-	-	-	Bilateral central, occasional theta sharp waves and synchronous spikes	-	Severe	-	Dyslexia, Dysgraphia	-	-	Many	Few	-	10	-	-
19	57	M	TSC1	c. 2111_2112delAT; p.(Tyr704Ter)	17	De novo (Father of 3)	SUB15233928	No	-	-	-	Normal	-	-	-	-	-	-	Many	Few	-	-	-	-
20	19	F	TSC1	c. 2111_2112delAT; p.(Tyr704Ter)	17	Inherited (Daughter of 19)	SUB15233928	No	-	-	-	Normal	-	-	-	-	-	-	Many	Few	-	-	-	-
21	25	M	TSC1	c.2380C>T; p.(Arg794Ter)	18	De novo	SUB15234011	Yes	60	Focal impaired awareness	28	Bilateral SWs	VPA; TPM; CBZ; LTG; EVR > Drug-Resistant	Severe	Level 1	Dyslexia, Dyscalculia	-	-	Many	Many	-	3	-	-
22	5	F	TSC1	c.2562del; p.(Glu857Arg*21)	21	De novo	SUB15234019	No	-	-	-	Normal	-	Mild	-	-	-	-	None	Few	-	-	-	-
23	17	M	TSC1	c.903C>T; p.(Arg228*)	8	De novo	GnomAD	Yes	36	Focal tonic seizures	5	Left SWs	TPM > Good control	-	-	-	-	-	Many	None	-	-	-	-
24	8	F	TSC1	c.648delT; p.(Phe216Leufs*16)	7	De novo	SUB15234029	No	-	-	-	Normal	-	-	Level 1	-	-	-	Few	Few	-	-	-	Limited
25	17	F	TSC1	c.388A>C; p.(Thr130Pro)	5	De novo	SUB15234041	Yes	12	Focal, blank stare, clonic, head and eyes deviation, hypertonic, arousal,fear	21	Bilateral central arceaux-like pattern; left central spikes	VPA; CBZ > Remission	Borderline	-	Dyslexia	ADHD	-	Few (1,5 mm)	Few, one next to FM with enhancement	-	-	-	Many
26	26	F	TSC1	c.508G>A; p.(Asp170Asn)	6	De novo	SUB15234045	Yes	13	Focal impaired awareness	7	Bilateral Spike and SWs	CBZ; VPA > Remission	-	-	-	-	-	Many (temporal, insular, frontal)	Many, some next to FM with enhancement	-	15	-	-
27	35	M	TSC1	c.2625_2975del (p.(Tyr704Ter)	21-22	De novo	SUB15234142	Yes	96	Generalized tonic clonic, absence	4	Bilateral SWs	VGB > Remission	-	-	-	-	-	Few (frontal, parietal)	Many	1 Left ventricle	3	-	-
28	28	F	TSC1	c.1770delT; p.(Pro590fs*37)	15	De novo	SUB15234050	Yes	12	Generalized tonic clonic	7	Bilateral SWs	PB; VPA; CBZ; TPM; CBD > Drug-Resistant	-	-	-	-	-	Many	Many	-	-	-	-
29	49	F	TSC1	c.163C>T; p.(Gln55Ter)	4	De novo	SUB15234063	Yes	36	Focal impaired awareness	3	Bilateral SWs	VPA; CBZ; TPM; CBD; EVE > Drug-Resistant	Severe	-	Dyslexia, Dyscaluclia, Dysgraphia	-	-	Few (occipital, temporal) Left	Many	-	-	-	-
30	50	F	TSC1	c.1525C>T; p.(Arg509Ter)	15	Inherited	ClinVar	Yes	37	Focal tonic seizures	6	Right SWs	VGB; CBZ > Remission	Mild	-	Dyslexia	ADHD	Panic Attacks	Many (parietal, occipital) (5-8mm)	Many (>100)	-	-	-	-
31	15	M	TSC1	c.2509_2512delAACA; p.(Ser836fs*10)	20	De novo	SUB15234070	No	-	-	-	Normal	-	Mild	-	-	-	Arousal Disturbances	Many	Many	-	-	-	-
32	9	M	TSC2	c.2127delT; p.(Leu710Trpfs*61	20	De novo	ClinVar	Yes	24	Generalized tonic clonic, perioral cianosis, absence, dystonic	21	Bilateral SWs; Diffuse theta waves	VGB; VPA > Remission	Mild	-	-	-	-	Many (frontal,parietal, cerebellar)	Many (<1cm), mild enhancement, one next to left FM	-	-	-	-
33	16	M	TSC2	c.133_136delCTGA; p.(Leu45Glnfs*3)	1	De novo	SUB15234109	Yes	8	Infantile Spasms	28	Hypsarrhytmia	VPA; VGB > Remission	Mild	Level 1	Dyslexia, Dyscalculia	Irritability	-	Many (some calcified with enhancement)	Many, calcified	-	-	-	-
34	6	F	TSC2	c.3094C>T; p.(Arg1032Ter)	27	De novo	ClinVar	Yes	9	Absence, generalized tonic clonic, epileptic status after vaccination	14	Bilateral SWs	VGB; VPA > Remission	Mild	-	Dyslexia	Irritability	-	Many (frontal, parietal, occipital, 1 cerebellar, 4mm)	Many ( 5-12mm), homogeneous enhancement, calcified	1 (1.2cm), next to FM, partially cystic, with enhancement	-	-	Many
35	18	M	TSC2	c.1217_1218delGA; p.(Arg406IIefs*3)	11	De novo	SUB15234148	Yes	6	Generalized tonic clonic, absence, eyes rolling, hypertonic,atonic	42	Right centro-temporal SWs	PB; CBZ > Remission	Mild	-	Dyslexia	ADHD	-	Many (Frontal, parietal) Right	Many, some next to FM with enhancement	-	-	1 (small)	-	Mild ventricular enlargement
36	9	F	TSC2	c.[(-106-?_-30+112)_(686_798)del]; (p.[(?)]	Intron 1 to Exon 8	De novo	SUB15234153	Yes	7	Clonic, absence	4	Left Central SWs	VPA > Remission	Mild (language)	-	Dyslexia	-	-	Many (Frontal, parietal, temporal, occipital, 1 cerebellar)	Many, mild enhancement	-	-	-	-
37	8	M	TSC2	c.1608_5189del (?)	16-41	De novo	SUB15234159	Yes	4	Generalized tonic clonic seizures	3	Bilateral SWs	VPA; VGB > Remission	Mild	Level 2	Dsylexia, Dysgraphia	ADHD	-	Many (frontal, parietal, temporal). The largest 3 cm left parietal	Many, the largest (1cm) next to left FM, mild enhancement	-	-	-	-
38	9	F	TSC2	c.1385G>A; p.(Arg462His)	13	De novo	ClinVar; GnomAD	Yes	5	Infantile spasms, blank stare, eyes rolling, loss of consciousness	7	Hypsarrhytmia	VPA, ACTH; VGB > 2-year remission; then Drug-Resistant	Mild	-	Dysgraphia	ADHD with oppositional/aggressive behavior	-	Many (frontal, parietal, temporal) R>L	Many (<1cm), one with enhancement next to FM	-	2	1 (small)	Many
39	11	M	TSC2	c.134_137delTGAG; p.(Val45Alafs*6)	4	De novo	SUB15234185	Yes	24	Focal seizures	12	Left parieto-temporal SWs	CBZ > Remission	-	-	-	-	-	Many	Many (calcified), one next to FM with moderate enhancement	-	-	-	Limited
40	19	F	TSC2	c.5201_5216dup; p.(Trp1740TyrfsTer40)	40	De novo (Grade 3 cousin of PT. 32)	SUB15234192	Yes	6	Infantile Spasms	28	Left temporal theta waves	VGB; TPM; FBM; EVR > Remission	Severe	Level 2	Dyslexia, Dyscaluclia, Dysgraphia	ADHD with oppositional/aggressive behavior	Insomnia; enuresis	Many	Many (some with enhancement) next to FM	1 with ventricular enlargement	-	-	Many
41	69	F	TSC2	c.3693_3696delGTCT; p.(Ser1232Thrfs*92)	30	Inherited	ClinVar, GnomAD	Yes	228	Generalized tonic clonic seizures	2	Bilateral SWs	PB > Good control	-	-	-	-	-	Many	Many	-	-	-	-
42	63	F	TSC2	c.3693_3696delGTCT; p.(Ser1232Thrfs*92)	30	Inherited	ClinVar, GnomAD	No	-	-	-	Normal	-	-	-	-	-	-	Many	Many	-	-	-	-
43	56	M	TSC2	c.3693_3696delGTCT; p.(Ser1232Thrfs*92)	30	Inherited	ClinVar, GnomAD	Yes	216	Focal seizurs	4	Normal	No treatment > Remission	-	-	-	-	-	None	Few	-	-	-	-
44	48	F	TSC2	c.3693_3696delGTCT; p.(Ser1232Thrfs*92)	30	Inherited	ClinVar, GnomAD	Yes	1	Generalized tonic clonic (only two episodes in the lifetime)	0.001	Normal	PB > Good control	-	-	-	-	-	None	Few	-	-	-	-
45	36	F	TSC2	c.3693_3696delGTCT; p.(Ser1232Thrfs*92)	30	Inherited	ClinVar, GnomAD	Yes	3	Infantile spasms	28	Hypsarrhytmia	ACTH > Remission	Mild	-	-	-	-	Many	Many	-	-	-	-
46	31	F	TSC2	c.3693_3696delGTCT; p.(Ser1232Thrfs*92)	30	Inherited	ClinVar, GnomAD	No	-	-	-	Normal	-	Mild	-	-	-	-	Many	Many	-	-	-	-
47	26	M	TSC2	c.3693_3696delGTCT; p.(Ser1232Thrfs*92)	30	Inherited	ClinVar, GnomAD	Yes	4	Infantile spasms, generalized tonic clonic, head clonic movements, loss of conscioussness, atonic	14	Hypsarrhythmia, Right sharp waves, Bilateral SWs	VPA; TPM > Partial control	Mild	-	Dyslexia	ADHD	-	Many (frontal, parietal, temporal)	Many	-	2	-	-
48	24	M	TSC2	c.3693_3696delGTCT; p.(Ser1232Thrfs*92)	30	Inherited	ClinVar, GnomAD	Yes	2	Infantile spasms, myoclonic seizures	-	Hypsarrhytmia	VPA > Remission	Moderate	Sub-clinical	Dyslexia, Dyscalculia	ADHD		Many (temporal,parietal, occipital)	Many	-	4	-	-
49	48	F	TSC2	c.3693_3696delGTCT; p.(Ser1232Thrfs*92)	30	Inherited (Daughter of 41)	ClinVar, GnomAD	Yes	276	Generalized tonic clonic (only two episodes in the lifetime)	0.001	Normal	PB > Good control	-	-	-	-	-	Many	Many	-	-	-	-
50	45	F	TSC2	c.3693_3696delGTCT; p.(Ser1232Thrfs*92)	30	Inherited (Daughter of 41)	ClinVar, GnomAD	No	-	-	-	Normal	-	-	-	-	-	-	Many	Many	-	-	-	-
51	35	F	TSC2	c.3693_3696delGTCT; p.(Ser1232Thrfs*92)	30	Inherited (Daughter of 41)	ClinVar, GnomAD	No	-	-	-	Normal	-	-	-	-	-	-	Many	Many	-	-	-	-
52	27	F	TSC2	c.3693_3696delGTCT; p.(Ser1232Thrfs*92)	30	Inherited (Daughter of 41)	ClinVar, GnomAD	Yes	24	Gelastic Seizures	5	Normal	No treatment > Remission	-	-	-	-	-	Many (frontal, parietal, temporal) Right	Many	-	4	-	-
53	22	M	TSC2	c.3693_3696delGTCT; p.(Ser1232Thrfs*92)	30	Inherited (Son of 43)	ClinVar, GnomAD	Yes	24	Infantile Spasms, Focal impaired awareness, myoclonic, epileptic status, hypertonic, loss of contact, arms clonic movements ,arousal, fear, head deviation,perioral cyanosis	4	Left fronto-temporal SWs	VPA; TPM; CBZ > Drug-Resistant	Severe	-	Dyslexia, Dyscaluclia, Dysgraphia	ADHD with oppositional/aggressive behavior	-	Many (frontal, parietal, occipital, temporal)	Many (calcified with enhancement), one next to FM	-	1	-	-
54	16	F	TSC2	c.3693_3696delGTCT; p.(Ser1232Thrfs*92)	30	Inherited (Daughter of 44)	ClinVar, GnomAD	No	-	-	-	Normal	-	-	-	-	-	-	Many	Many	-	-	-	-
55	15	F	TSC2	c.3693_3696delGTCT; p.(Ser1232Thrfs*92)	30	Inherited (Daughter of 45)	ClinVar, GnomAD	Yes	9	Focal impaired awareness, blank stare, loss of contact, upper limbs hypertonia, head flushing, eyes rolling	21	Left frontotemporal SWs, often generalized	TPM; VPA; CLB > Drug-Resistant	Severe	Sub-clinical	Dyslexia, Dyscalculia	ADHD with oppositional/aggressive behavior	-	Many (frontal,temporal,occipital) Right	Many (calcified) some next to FM (some with enhancement)	-	-	-	-
56	3	F	TSC2	c.3693_3696delGTCT; p.(Ser1232Thrfs*92)	30	Inherited (Daughter of 46)	ClinVar, GnomAD	Yes	6	Infantile spasms, hypertonic, clonic, eyes deviation, loss of contact, blank stare	21	Right frontotemporal SWs, often generalized	VPA, TPM, ACTH, VGB, CBZ > Partial control	-	-	-	-	-	Many	Many	-	-	-	-
57	6	F	TSC2	c.4545_4546delCA; p.(Asn1515Lysf*8)	34	De novo	SUB15234203	Yes	8	Focal seizures	5	Left temporal SWs	VGB > Partial control	Moderate	-	Dyslexia, Dyscalculia	-	-	Many	Few (<1cm), mild enhancement	-	-	5	Many
58	12	F	TSC2	c.1600_2545dup p.(Thr849SerfsTer55)	16 to 22	Inherited	SUB15237360	Yes	12	Focal seizures	6	Right frontal SWs, often generalized	VPA, TPM, ACTH, EVR > Partial control	Mild	-	-	-	-	Many (frontal,parietal,occipital,cerebellar)	Many (calcified)	1 (1,3cm), next to FM (intense enhancement) surgery	-	-	Many
59	46	F	TSC2	c.910T>C; p.(Trp304Arg)	9	De novo	ClinVar; GnomAD	No	-	-	-	Normal	-	-	-	-	-	-	None	-	-	-	-	-
60	7	M	TSC2	c.910T>C; p.(Trp304Arg)	9	Inherited from Pt. 59	ClinVar; GnomAD	No	-	-	-	Normal	-	-	-	-	-	-	None	-	-	-	-	Many
61	2	F	TSC2	c.3598C>T; p.(Arg1200Trp)	30	De novo	ClinVar; GnomAD	No	-	-	-	Normal	-	-	-	-	-	-	Many	-	-	-	-	Limited
62	4	F	TSC2	c.1373C>T; p.(Arg458Ter) [SOMATIC MOSAICISM, 11.4%]	14	De novo	ClinVar; GnomAD	No	-	-	-	Normal	-	Moderate	Level 2	Dyslexia, Dysgraphia	Aggressivity; Oppositive behavior	-	Few	Few	-	-	-	Limited
63	6	M	TSC2	c.1745_3254del (?)	17 to 28	De novo	SUB15234242	No	-	-	-	Normal	-	-	-	-	-	-	Many	Few	-	-	-	-
64	58	F	TSC2	c.4813C>T; p.(Gln1605Ter)	38	De novo	SUB15234212	No	-	-	-	Normal	-	-	-	-	-	-	Many	-	-	-	-	-
65	38	F	TSC2	c.4805_4806delAG; p.(Glu1602Glyfs?)*	38	De novo	SUB15234220	Yes	7	Infantile Spasms, generalized tonic clonic, myoclonic, loss of contact, eyes rolling	140	Left central-posterior O sharp theta waves and few spikes	ACTH; VPA, CZP > remission till 18 yeard old, then started again, with partial control	Severe	-	Dyslexia, Dyscaluclia, Dysgraphia	Aggressivity; Oppositive behavior	-	Many (parietal, occipital)	Many, with enhancement, the largest of 1 cm next to FM	-	-	-	Limited
66	7	M	TSC2	c.488_489delTT; p.(Phe163Cysfs*25)	5	De novo	SUB15234224	Yes	24	Focal seizures, blank stare, head deviation, apnea, clonic movements	3	Right temporal Delta-theta waves; bilateral SWs	PB, VGB, TPM > Partial control	Moderate	-	Dyslexia, Dysgraphia	ADHD	-	Many (frontal)	Few, one with enhancement next to FM	-	-	-	Limited	Corpus Callosum hypoplasia
67	18	M	TSC2	c.3412C>T; p.(Arg1138*)	29	De novo	ClinVar	Yes	6	Infantile spasms, Focal seizures, head fall, cry, loss of contact, clonic, blank stare	35	Left centrotomporal and Right temporal indipendent spikes and Theta waves	CBZ, VGB, LTG, TPM > Good control	Severe	-	Dyslexia, Dyscaluclia, Dysgraphia	Severe behaviour disorders, ADHD; Autoaggressivity; No response to antipsychotic drugs	Insomnia	Many (frontal, parietal, temporal) L>R	Many, one next FM, the largest >1cm	+1 sega (1.5cm) with enhancement not next to FM (atypical position)	-	-	Many	Corpus Callosum hypoplasia
68	23	M	TSC2	c.156_848del (?)	3 to 9	De novo	SUB15234375	Yes	1	Infantile spasms, Focal seizures, clonic movements, head deviation, loss of contact, hypertonic, epileptic status	14	Left frontotemporal and right temporoccipital O-theta waves, Bilateral SWs	VPA, PB, VGB, CLB, ACTH > Drug-Resistant	Severe	-	Dyslexia, Dyscaluclia, Dysgraphia	Severe behaviour disorder; agitation; oppositional disorder; aggressivity; No response to antipsychotic drugs	+	Few (cerebellum)	Many	2 (the largest, 1.5cm in the right ventricle, surgery)	-	-	-
69	71	M	TSC2	c.1096G>T; p.(Glu366Ter)	10	De novo (Father of 70, 71,72,73)	ClinVar	No	-	-	-	Normal	-	-	-		-	-	Many (frontal, temporal, occipital)	Few	-	-	-	-
70	39	M	TSC2	c.1096G>T; p.(Glu366Ter)	10	Inherited from Pt. 69	ClinVar	Yes	4	Infantile spasms, focal impaired awareness	34	Hypsarrhytmia	Unknown	Severe	Level 2	Dyslexia, Dyscaluclia, Dysgraphia	-	-	Few (parietal)	Few	-	-	-	-
71	46	M	TSC2	c.1096G>T; p.(Glu366Ter)	10	Inherited from Pt. 69	ClinVar	Yes	22	Focal impaired awareness	8	Left frontal spikes	Unknown	Severe	-	Dyslexia, Dysgraphia	-	-	Few (parietal)	Few	-	-	-	-
72	35	F	TSC2	c.1096G>T; p.(Glu366Ter)	10	Inherited from Pt. 69	ClinVar	Yes	5	Infantile spasms	27	Hypsarrhytmia	Unknown	Severe	-	Dyslexia, Dysgraphia	-	-	Few (frontal, temporal)	-	-	-	-	-
73	50	F	TSC2	c.1096G>T; p.(Glu366Ter)	10	Inherited from Pt. 69	ClinVar	Yes	29	Focal impaired awareness	6	Left temporal SWs	CBZ; VPA; VGB > Drug-Resistant	Severe	-	Dyslexia, Dysgraphia	-	-	Many (frontal, temporal, occipital)	Many	-	-	-	-
74	18	F	TSC2	c.1096G>T; p.(Glu366Ter)	27	De novo	SUB15234222	Yes	5	Focal impaired awareness, generalized tonic clonic, febrile seizures	1	Right frontoparietal SWs, often generalized	VPA > Drug-Resistant	-	-	-	-	-	Many (frontal, parietal, temporal, occipital)	Many, some next to FM	-	1	-	-
75	26	F	TSC2	c.1283_1285delCCT; p.(Ser428del)	12	De novo	SUB15234237	No	-	-	-	Normal	-	-	-	-	-	-	Few (frontal, temporal)	Many	1 (surgery)	-	-	-
76	22	F	TSC2	c.1_1230del (?)	1	De novo	SUB15234362	Yes	12	Focal impaired awareness	7	Left frontotemporal SWs	VPA > Drug-Resistant	-	-	-	-	-	Many (frontal, parietal, temporal, occipital)	Few	-	-	-	-
77	36	M	TSC2	c.1372C>T; p.Arg(458*)	13	Inherited	ClinVar	Yes	27	Generalized tonic clonic, epileptic status	5	Bilateral SWs	-	Severe	-	Dyslexia, Dyscaluclia, Dysgraphia	-	-	None	-	-	-	-	-
78	40	M	TSC2	c.3393G>C p.(Met1131Ile)	28	De novo	SUB15237397	No	-	-	-	Normal	-	Mild	-	-	-	-	Few	Few	1 (1.8 cm)	-	-	-
79	26	M	TSC2	c.226-3C>G; p.(Glu75fs?)	Intron 2	De novo	SUB15234207	Yes	2	Infantile spasms, focal impaired awareness	35	Hypsarrhytmia	VPA > Drug-Resistant	Severe	-	Dyslexia, Dyscaluclia, Dysgraphia	-	-	Many (frontal, parietal, occipital)	Many, the largest next to FM	-	-	-	-
80	25	F	TSC2	c.2221-1G>C (p.?)	Intron 19	De novo	SUB15234240	Yes	5	Infantile spasms	28	Hypsarrhytmia	VGB > Drug-Resistant	Moderate	Level 2	Dyslexia, Dyscalculia	-	-	Many (Frontal, parietal, temporal, occipilta) L>R	Many, some next to FM with enhancement	-	-	-	-	Ventricular enlargement
81	26	M	TSC2	c.3610-9_3610-4del (p.?)	Intron 29	De novo	SUB15237421	Yes	5	Infantile spasms	28	Hypsarrhytmia; Bilateral 3Hz SWs	VGB > Remission	-	-	-	-	-	Many (frontal, parietal)	-	-	-	-	Many
LEGEND supplementary table 1: F: Female; LAM: Lymphangioleymiomatosis; M: Male; + Present; - Absent" and "LEGEND supplementary table 2: CBZ: Carbamazepine; CLB: Clobazam; CZP: Clonazepam; EVR: Everolimus; FB: Fenobarbital; FBM: Felbamate; FM: Foramen of Monroe; L: Left; LTG: Lamotrigine; OXC: Oxcarbazepine; R: Right; SWs: Spike and Waves pattern; TPM: Topiramate; VGB: Vigabatrin; VPA: Valproid Ac…

## Sheet: Foglio2
TSC1	c.1355_1358delGTTC	p.(Gly452Valfs*4)	De novo			TSC1
TSC1	c.-219_-144+3del	p.(?)	De novo			NM_000368.5	hg38
TSC1	c. 2111_2112delAT	p.(Tyr704Ter)	Inherited			omim	191100
TSC1	c.2672dupA	p.(Asn891Lysfs*13)	De novo
TSC1	c.2293C>T	p.(Gln765Ter)	De novo	ClinVar
TSC1	c.938C>T	p.(Ser313Phe)	De novo	GnomAD
TSC1	c.1888_1891delAAAG	p.(Lys629 fs>+21aa)	Inherited			TSC2
TSC1	c.1888_1891delAAAG	p.(Lys629 fs>+21aa)	Inherited (son of 7)			NM_000548.5
TSC1	c.192_195del	p.(Leu64Phefs*34)	Inherited			OMIM	613254
TSC1	c.2215C>T	p.(Gln739*)	Inherited	ClinVar
TSC1	c.1004delC	p.(Tyr335Asnfs*3)	De novo
TSC1	c.1004delC	p.(Tyr335Asnfs*3)	Inherited (son of 11)
TSC1	c.1498C>T	p.(Arg500Ter)	De novo (mother of 14, 15)	ClinVar
TSC1	c.1498C>T	p.(Arg500Ter)	Inherited (daughter of 13)	ClinVar
TSC1	c.1498C>T	p.(Arg500Ter)	Inherited (daughter of 13)	ClinVar
TSC1	c.1498C>T	p.(Arg500Ter)	Inherited (son of 14)	ClinVar
TSC1	c.1498C>T	p.(Arg500Ter)	Inherited (daughter of 15)	ClinVar
TSC1	c.1498C>T	p.(Arg500Ter)	Inherited (daughter of 15)	ClinVar
TSC1	c. 2111_2112delAT	p.(Tyr704Ter)	De novo (Father of 3)
TSC1	c. 2111_2112delAT	p.(Tyr704Ter)	Inherited (Daughter of 19)
TSC1	c.2380C>T	p.(Arg794Ter)	De novo
TSC1	c.2562del	p.(Glu857Arg*21)	De novo
TSC1	c.903C>T	p.(Arg228*)	De novo	GnomAD
TSC1	c.648delT	p.(Phe216Leufs*16)	De novo
TSC1	c.388A>C	p.(Thr130Pro)	De novo
TSC1	c.508G>A	p.(Asp170Asn)	De novo
TSC1	ex.21_22del (3.419del)	p.(Lys875fs)	De novo
TSC1	c.1770delT	p.(Pro590fs*37)	De novo
TSC1	c.163C>T	p.(Gln55Ter)	De novo
TSC1	c.1525C>T	p.(Arg509Ter)	Inherited	ClinVar
TSC1	c.2509_2512delAACA	p.(Ser836fs*10)	De novo
