# Supplementary material for: Genetic Screening of Tuberous Sclerosis Complex in Sicily with a Focus on Neurological Manifestations
Source: Research Square preprint supplement (doi:10.21203/rs.3.rs-5804009/v1), 2025-04-14
Supplement: Supplementary file 2 [file c4bac2c54aaf69470233cf33.xlsx]

## Sheet: Foglio1
Patient	Age	Sex	Genetics		Cardiac Rhabdomyomas	Renal involvement		LAM	Retinal Hamartomas	Dermatologic Features						Gingival Fibromas	Skeletal Involvement
			Gene	Variant		Angiomyolipomas	Renal Cysts			Facial Angiofibromas	Shagreen Patches	Hypomelanotic Macules	Fibrous Cephalic Plaque	Ungual Fibromas	Enamel Pits		Bone Cortical Dysplasia	Sclerotic Bone Lesions
1	8	M	TSC1	c.1355_1358delGTTC; p.(Gly452Valfs*4)	+	+	-	-	-	+	-	+	-	-	-	+	-	-
2	11	M	TSC1	c.-219_-144+3del; p.(?)	+	-	-	-	+	+	+	+	-	-	-	-	-	+
3	21	F	TSC1	c. 2111_2112delAT; p.(Tyr704Ter)	+	+	-	-	-	+	-	+	-	-	-	-	-	+
4	6	F	TSC1	c.2672dupA; p.(Asn891Lysfs*13)	-	-	-	-	-	+	+	+	-	+	+	-	-	-
5	37	M	TSC1	c.2293C>T; p.(Gln765Ter)	+	-	-	-	+	+	+	+	-	+	-	+	-	+
6	23	M	TSC1	c.938C>T; p.(Ser313Phe)	-	+	+	-	-	-	-	+	+	-	-	+	+	+
7	52	M	TSC1	c.1888_1891delAAAG; p.(Lys629 fs>+21aa)	-	+	+	-	+	-	+	+	+	+	-	+	-	+
8	21	M	TSC1	c.1888_1891delAAAG; p.(Lys629 fs>+21aa)	+	-	-	-	-	+	-	+	-	-	+	+	+	+
9	21	M	TSC1	c.192_195del; p.(Leu64Phefs*34)	+	+	-	-	-	-	+	+	-	+	+	+	+	-
10	45	F	TSC1	c.2215C>T; p.(Gln739*)	-	+	+	-	-	-	-	+	+	+	-	+	-	-
11	41	M	TSC1	c.1004delC; p.(Tyr335Asnfs*3)	+	-	+	-	+	-	+	+	+	+	+	-	-	+
12	10	M	TSC1	c.1004delC; p.(Tyr335Asnfs*3)	+	+	+	-	+	-	-	+	+	+	-	+	-	-
13	60	F	TSC1	c.1498C>T; p.(Arg500Ter)	-	-	-	-	+	-	+	+	-	+	+	+	-	-
14	33	F	TSC1	c.1498C>T; p.(Arg500Ter)	+	+	-	-	-	+	+	+	+	-	-	-	+	-
15	26	F	TSC1	c.1498C>T; p.(Arg500Ter)	+	-	-	-	+	-	-	+	-	+	+	+	+	+
16	2	M	TSC1	c.1498C>T; p.(Arg500Ter)	+	-	-	-	-	-	-	+	-	-	-	-	-	-
17	7	F	TSC1	c.1498C>T; p.(Arg500Ter)	-	+	-	-	+	+	+	+	+	+	-	-	+	-
18	3	F	TSC1	c.1498C>T; p.(Arg500Ter)	+	-	-	-	-	+	-	+	+	-	-	-	+	-
19	57	M	TSC1	c. 2111_2112delAT; p.(Tyr704Ter)	+	-	+	-	+	+	-	+	-	+	-	-	-	+
20	19	F	TSC1	c. 2111_2112delAT; p.(Tyr704Ter)	-	-	-	-	+	+	-	+	+	-	+	+	-	+
21	25	M	TSC1	c.2380C>T; p.(Arg794Ter)	+	+	+	-	-	+	-	+	-	+	+	+	-	-
22	5	F	TSC1	c.2562del; p.(Glu857Arg*21)	+	-	-	-	+	-	-	+	-	-	-	+	+	-
23	17	M	TSC1	c.903C>T; p.(Arg228*)	+	+	-	-	+	-	+	+	-	-	+	-	-	+
24	8	F	TSC1	c.648delT; p.(Phe216Leufs*16)	+	-	+	-	-	-	+	+	+	+	-	+	-	+
25	17	F	TSC1	c.388A>C; p.(Thr130Pro)	-	+	+	-	-	-	+	+	+	-	+	+	-	+
26	26	F	TSC1	c.508G>A; p.(Asp170Asn)	+	+	-	-	+	+	-	+	-	+	-	-	+	+
27	35	M	TSC1	c.2625_2975del (p.(Tyr704Ter)	+	+	+	-	-	-	-	+	-	+	-	-	+	+
28	28	F	TSC1	c.1770delT; p.(Pro590fs*37)	-	-	+	-	+	-	-	+	+	+	+	+	+	+
29	49	F	TSC1	c.163C>T; p.(Gln55Ter)	+	+	-	-	-	-	+	+	-	+	+	-	+	+
30	50	F	TSC1	c.1525C>T; p.(Arg509Ter)	?	-	-	+	+	+	-	+	-	+	-	+	-	+
31	15	M	TSC1	c.2509_2512delAACA; p.(Ser836fs*10)	-	+	+	+	-	-	+	+	+	+	+	-	-	+
32	9	M	TSC2	c.2127delT; p.(Leu710Trpfs*61	+	-	+	-	+	+	+	+	-	+	-	+	+	-
33	16	M	TSC2	c.133_136delCTGA; p.(Leu45Glnfs*3)	-	-	+	+	+	+	+	+	-	-	+	+	+	+
34	6	F	TSC2	c.3094C>T; p.(Arg1032Ter)	+	-	+	-	+	-	+	+	+	-	-	+	+	+
35	18	M	TSC2	c.1217_1218delGA; p.(Arg406IIefs*3)	+	-	+	+	-	+	+	+	-	+	-	+	+	+
36	9	F	TSC2	c.[(-106-?_-30+112)_(686_798)del]; (p.[(?)]	+	-	-	-	+	+	+	+	+	-	+	+	+	-
37	8	M	TSC2	c.1608_5189del (?)	+	-	-	-	+	+	-	+	+	+	+	+	+	-
38	9	F	TSC2	c.1385G>A; p.(Arg462His)	+	-	+	-	-	+	-	+	-	-	-	+	+	-
39	11	M	TSC2	c.134_137delTGAG; p.(Val45Alafs*6)	-	+	+	+	+	+	+	+	+	+	-	-	+	+
40	19	F	TSC2	c.5201_5216dup; p.(Trp1740TyrfsTer40)	+	-	+	+	+	+	-	+	-	+	+	+	-	-
41	69	F	TSC2	c.3693_3696delGTCT; p.(Ser1232Thrfs*92)	?	+	+	+	+	+	-	+	+	-	+	+	-	+
42	63	F	TSC2	c.3693_3696delGTCT; p.(Ser1232Thrfs*92)	?	+	+	+	-	+	-	+	+	-	+	+	+	-
43	56	M	TSC2	c.3693_3696delGTCT; p.(Ser1232Thrfs*92)	+	-	+	+	+	+	+	+	+	+	+	-	-	+
44	48	F	TSC2	c.3693_3696delGTCT; p.(Ser1232Thrfs*92)	?	+	+	+	+	+	+	+	+	-	+	-	-	+
45	36	F	TSC2	c.3693_3696delGTCT; p.(Ser1232Thrfs*92)	+	-	+	+	+	+	+	+	+	-	+	-	+	-
46	31	F	TSC2	c.3693_3696delGTCT; p.(Ser1232Thrfs*92)	+	-	+	+	+	+	-	+	-	+	+	+	-	+
47	26	M	TSC2	c.3693_3696delGTCT; p.(Ser1232Thrfs*92)	+	-	-	+	-	+	+	+	+	+	+	+	-	-
48	24	M	TSC2	c.3693_3696delGTCT; p.(Ser1232Thrfs*92)	+	+	+	+	+	+	-	+	+	+	-	+	+	+
49	48	F	TSC2	c.3693_3696delGTCT; p.(Ser1232Thrfs*92)	+	-	+	+	+	+	-	+	+	+	+	+	+	-
50	45	F	TSC2	c.3693_3696delGTCT; p.(Ser1232Thrfs*92)	+	+	+	+	+	+	+	+	+	+	+	+	+	+
51	35	F	TSC2	c.3693_3696delGTCT; p.(Ser1232Thrfs*92)	+	+	+	+	-	+	+	+	+	+	+	+	-	+
52	27	F	TSC2	c.3693_3696delGTCT; p.(Ser1232Thrfs*92)	+	-	+	+	+	+	+	+	+	-	+	-	-	-
53	22	M	TSC2	c.3693_3696delGTCT; p.(Ser1232Thrfs*92)	+	+	+	+	-	+	-	+	-	+	+	-	+	+
54	16	F	TSC2	c.3693_3696delGTCT; p.(Ser1232Thrfs*92)	-	+	-	+	+	+	+	+	-	-	-	+	+	-
55	15	F	TSC2	c.3693_3696delGTCT; p.(Ser1232Thrfs*92)	-	+	+	+	-	+	+	+	+	-	+	-	+	+
56	3	F	TSC2	c.3693_3696delGTCT; p.(Ser1232Thrfs*92)	+	-	+	-	-	-	-	+	+	+	+	+	-	-
57	6	F	TSC2	c.4545_4546delCA; p.(Asn1515Lysf*8)	+	-	+	-	+	+	-	+	-	+	-	+	+	+
58	12	F	TSC2	c.1600_2545dup p.(Thr849SerfsTer55)	-	-	+	+	+	+	+	+	+	+	+	+	+	-
60	46	F	TSC2	c.910T>C; p.(Trp304Arg)	+	+	-	-	+	+	+	+	-	-	-	+	+	-
59	7	M	TSC2	c.910T>C; p.(Trp304Arg)	+	+	+	-	+	+	+	+	+	+	+	+	+	-
61	2	F	TSC2	c.3598C>T; p.(Arg1200Trp)	+	-	+	-	-	-	-	+	-	+	+	-	-	-
62	4	F	TSC2	c.1373C>T; p.(Arg458Ter) [SOMATIC MOSAICISM, 11.4%]	+	-	+	-	-	-	-	+	+	-	-	-	-	-
63	6	M	TSC2	c.1745_3254del (?)	+	-	+	-	-	-	-	+	-	-	-	+	+	-
64	58	F	TSC2	c.4813C>T; p.(Gln1605Ter)	-	+	+	+	+	+	+	+	+	-	-	+	+	+
65	38	F	TSC2	c.4805_4806delAG; p.(Glu1602Glyfs?)*	-	+	+	-	+	+	+	+	-	-	-	+	+	-
66	7	M	TSC2	c.488_489delTT; p.(Phe163Cysfs*25)	+	-	+	-	-	+	+	+	-	+	+	-	+	+
67	18	M	TSC2	c.3412C>T; p.(Arg1138*)	-	+	+	-	-	+	+	+	+	+	+	+	-	+
68	23	M	TSC2	c.156_848del (?)	+	+	+	-	+	+	+	+	-	+	-	+	+	+
70	71	M	TSC2	c.1096G>T; p.(Glu366Ter)	?	+	+	+	+	-	-	+	-	-	-	+	+	-
69	39	M	TSC2	c.1096G>T; p.(Glu366Ter)	+	+	+	-	+	+	+	+	+	-	-	+	+	+
71	46	M	TSC2	c.1096G>T; p.(Glu366Ter)	+	+	+	-	+	+	+	+	+	+	+	+	+	-
72	35	F	TSC2	c.1096G>T; p.(Glu366Ter)	+	+	+	+	+	+	+	+	+	+	+	+	+	-
73	50	F	TSC2	c.1096G>T; p.(Glu366Ter)	-	+	+	-	+	-	-	+	+	+	+	+	-	-
74	18	F	TSC2	c.1096G>T; p.(Glu366Ter)	-	+	+	-	+	+	+	+	+	+	+	+	-	+
75	26	F	TSC2	c.1283_1285delCCT; p.(Ser428del)	+	+	+	-	+	-	+	+	+	+	+	+	-	-
76	22	F	TSC2	c.1_1230del (?)	+	+	-	-	-	-	+	+	-	-	+	+	+	+
77	36	M	TSC2	c.1372C>T; p.Arg(458*)	-	+	+	+	+	+	-	+	+	-	+	+	+	-
78	40	M	TSC2	c.3393G>C p.(Met1131Ile)	-	-	+	+	+	+	+	+	+	+	+	+	+	-
79	26	M	TSC2	c.226-3C>G; p.(Glu75fs?)	+	-	+	-	+	-	+	+	+	+	+	+	-	-
80	25	F	TSC2	c.2221-1G>C (p.?)	+	-	-	-	+	+	+	+	+	+	+	-	+	+
81	26	M	TSC2	c.3610-9_3610-4del (p.?)	+	-	-	-	+	+	-	+	+	-	+	+	+	+
Legend for Supplemtantary Table 2: F: Female; LAM: Lymphangioleymiomatosis; M: Male; + Present; - Absent
